# Supplementary material for: Equilibrium scaling of phase separated elastin-like polypeptides for engineered condensates
Source: Royal Society of Chemistry journal article supplement (doi:10.1039/d5sm00873e), 2025-11-24
Supplement: d5sm00873e1.pdf [file d5sm00873e1.pdf]

# Equilibrium Scaling of Phase Separated Elastin-Like Polypeptides for Engineered Condensates

## Supplemental Information

Adam Quintana, Gabriel Lopez, Nick Carroll

## 1 Critical Temperature Chain Length Dependence

The question for wheather the interaction parameter in Flory-Huggins theory (i.e.  $\chi$ ) should depend on the polymer length (i.e.  $N$ ) can be ascribed to the exact form of the polymer length dependence of the critical temperature (i.e.  $T_c(N)$ ). We show in this section that only a specific form of  $T_c(N)$  provides a chain length invariant  $\chi$ . This then implies that a general form of  $T_c(N)$  necessitates the functional dependence  $\chi(N, T)$ .

As described in the main manuscript, the generalized form for the interaction parameter is given as:

$$\chi(N, T) = \frac{1}{2} + \psi(N)w(T) \quad (S1)$$

Where

$$w(T) = 1 - \frac{T_\theta}{T} + \alpha \ln \frac{T_\theta}{T} \quad (S2)$$

As (S1) is valid for all temperatures, it should stand that this equation applied to the critical temperature  $T_c(N)$  would satisfy the critical interaction parameter  $\chi_c(N)$  from Flory[1]. Re-arrangement of (S1) applied to the critical condition allows us to determine the functional form for  $\psi(N)$ .

$$\psi(N) = \frac{\chi_c(N) - \frac{1}{2}}{w(T_c(N))} \quad (S3)$$

Hence, (S3) is generally valid for any form of  $T_c(N)$ . However, if we were to demand that  $\chi$  be invariant to  $N$ , and thus  $\partial\chi/\partial N = 0$ , then  $\partial\psi/\partial N = 0$ . After rearrangement of (S1) applied at the critical condition we arrive at the following equation which is transcendental in  $T_\theta/T_c$ .

$$\frac{T_\theta}{T_c} - \alpha \ln \frac{T_\theta}{T_c} = 1 - \frac{\chi_c(N) - \frac{1}{2}}{\psi} \quad (S4)$$

This equation will provide the appropriate form for  $T_c(N)$  which satisfies a chain length invariant  $\chi$  so long as  $\psi$  is a constant. Yet, the transcendental nature of (S4) requires use of Lambert W-function[2] to solve for  $T_c$ . With a few more algebraic steps, (S4) is equivalent to:

$$-\frac{T_\theta}{\alpha T_c} + \ln \frac{T_\theta}{\alpha T_c} = - \left( \frac{\psi - \chi_c(N) + \frac{1}{2}}{\alpha\psi} + \ln \alpha \right) \quad (S5)$$

Taking an exponential and negating gives:

$$-\frac{T_\theta}{\alpha T_c} e^{-\left(\frac{T_\theta}{\alpha T_c}\right)} = - \left( \frac{1}{\alpha} \right) e^{\left(\frac{\chi_c(N) - \frac{1}{2} - \psi}{\alpha\psi}\right)} \quad (S6)$$

Analysis of (S1) and (S2) reveals that  $\chi$  has a maximum value when  $T = T_\theta/\alpha$ . Therefore,  $T_c < T_\theta/\alpha$ , otherwise  $\chi < \chi_c$  and phase separation would not occur. Use of the Lambert W-function to (S6) must then be through the negative branch or  $W_{-1}$ [2]. Solving for  $T_c$  we find:

$$T_c(N) = -\frac{T_\theta}{\alpha} \left( W_{-1} \left( - \left( \frac{1}{\alpha} \right) e^{\left(\frac{\chi_c(N) - \frac{1}{2} - \psi}{\alpha\psi}\right)} \right) \right)^{-1} \quad (S7)$$

Although (S7) is the exact expression, which would guarantee a chain length invariant  $\chi$ , it is not expressible in basic mathematical functions, which is analytically inhibiting. Hence, we can make a few approximations to generate a simpler form for analysis. Assuming  $1 - \frac{T_\theta}{T_c} \ll 1$ , which is equivalent to  $T_c - T_\theta \ll T_c$ , we can use a first-order Taylor series on the  $\ln$  term.

$$\ln \frac{T_\theta}{T_c} \approx \frac{T_\theta}{T_c} - 1 \quad (\text{S8})$$

This allows us to solve for  $T_c$  directly in (S4).

$$T_c \approx T_\theta \frac{1}{1 - \frac{\chi_c(N) - \frac{1}{2}}{\psi(1-\alpha)}} \quad (\text{S9})$$

The same assumption used in (S8) allows us to approximate (S9) using a first-order Taylor series.

$$T_c \approx T_\theta + \frac{T_\theta}{2\psi(1-\alpha)} \left( \frac{2}{\sqrt{N}} + \frac{1}{N} \right) \quad (\text{S10})$$

This form for  $T_c(N)$  will ensure that  $\partial\chi/\partial N \approx 0$  when  $\psi$  is a constant. It should be noted that (S10) only approximates (S7) and does not capture the existence of poles which may exist due to the factor of  $1/W_{-1}$  at low  $N$ . Therefore, the approximation is mostly valid for large  $N$ . The critical temperature dependence chosen in the main manuscript was a more general form given in equation (11), written here for convenience.

$$T_c = T_\theta + \delta_T N^{-\gamma} \quad (\text{S11})$$

The generalized form (S11) will functionally deviate from the specific form (S10) when  $N$  is small, as they both tend toward  $T_\theta$  for large  $N$ . We can compare this generalized form with the approximation of the chain length invariant form and find where the two will be functionally equivalent. With a substitution of the dependent variable to  $y = 1/\sqrt{N}$ , we can approximate (S11) with a second-order Taylor series about  $y = 1$  which is the lowest value of pertinence (i.e.  $N = 1$ ).

$$T_c \approx T_\theta + \delta_T \left( 1 + 2\gamma \left( \frac{1}{\sqrt{N}} - 1 \right) + 2\gamma(2\gamma - 1) \left( \frac{1}{\sqrt{N}} - 1 \right)^2 \right) \quad (\text{S12})$$

Expanding and collecting like terms, we find that the generalized form for  $T_c(N)$  will analytically approximate the specific form of (S10) when

$$\gamma = \frac{5}{8} \quad (\text{S13})$$

and

$$\delta_T = \frac{T_\theta}{\gamma\psi(1-\alpha)}. \quad (\text{S14})$$

However,  $T_\theta$  will be shifted by  $1.9375\delta_T$ .

Therefore, only under the specific form for the critical temperature as given by (S7) and approximated by (S10) for large  $N$  will the interaction parameter of (S1) and (S2) be invariant to chain length  $N$ . The generalized form given by (S11) will approximate the specific form of (S10) when  $\gamma = 5/8$ . This implies this value of  $\gamma$  will give the approximate form necessary to make  $\chi$  invariant to  $N$ , valid at large  $N$ . Any other value of  $\gamma$ , or any other generalized form for  $T_c(N)$ , will necessitate that  $\chi$  vary with  $N$  according to (S3).

## 2 Physical meaning of $\alpha$

The parameter  $\alpha$  is newly introduced in the temperature dependence of the classical Flory-Huggins interaction parameter. This term was derived as being related to the mixing contribution to the heat capacity  $C_m$ .

$$C_m = \alpha k_B \langle \phi(1-\phi) \rangle \quad (\text{S15})$$

If we suppose that the total heat capacity is a sum of individual contributions scaled with polymer volume fraction  $\phi$  [3], we obtain:

$$C = C_p \phi_0 + C_s(1 - \phi_0) + C_m \quad (\text{S16})$$

Where  $C_p$  and  $C_s$  are the pure polymeric and pure solvent heat capacities respectively, and  $\phi_0$  is the system polymer volume fraction. Thus the parameter  $\alpha$  scales the mixing contribution to heat capacity which is weighted by the term  $\langle \phi(1 - \phi) \rangle$  conferring dependence on polymer concentration and phase state. The assumption that  $\partial\alpha/\partial\beta = 0$ , where  $\beta = 1/k_B T$  implies that the thermal variance of  $C_m$  lies solely on  $\langle \phi(1 - \phi) \rangle$ . This term can be further expanded:

$$\langle \phi(1 - \phi) \rangle = \phi_0 - \langle \phi^2 \rangle \quad (\text{S17})$$

Here we make use of the conservation of volume fraction to obtain  $\langle \phi \rangle = \phi_0$ . The second term can be further expanded in terms of the coacervate volume ratio  $p$  and the dense and dilute volume fractions,  $\phi''$  and  $\phi'$  respectively.

$$\langle \phi^2 \rangle = (\phi''^2 - \phi'^2) p + \phi'^2 = (\phi_0 - \phi')(\phi'' + \phi') + \phi''^2 \quad (\text{S18})$$

Here we substitute  $p$  as determined through a volume conservation constraint. As both  $\phi''$  and  $\phi'$  depend sensitively on  $T$  and  $N$ ,  $\langle \phi^2 \rangle$  and thus  $C_m$  will be likewise dependent. If  $\partial\alpha/\partial\beta \neq 0$ , then  $C_m$  will inherit the specific thermal dependencies of  $\alpha(T)$ , yet without experimental measurements of heat capacities such thermal dependencies cannot be determined. It should be noted that this form for  $\langle \phi^2 \rangle$  is only valid when  $\chi > \chi_c(N)$ , otherwise the solution is homogeneous and  $\langle \phi^2 \rangle = \phi_0^2$ .

## References

- [1] P. J. Flory. *Principles of polymer chemistry*. Cornell University Press, 1953.
- [2] NIST:DLMF. Nist digital library of mathematical functions, 4.13 lambert w-function.
- [3] A. S. Teja. Simple method for the calculation of heat capacities of liquid mixtures. *J. Chem. Eng. Data*, 28(1):83–85, 1983.
